# Supplementary material for: Eco-Engineered Alginate Zr/Mn Hydrogel for Ultra-Efficient Cr(VI) Removal: Insights into Mechanism and Performance
Source: Research Square preprint supplement (doi:10.21203/rs.3.rs-7330088/v1), 2025-11-13
Supplement: Supplementary file 1 [file e4ffd36190d96735b0780efe.docx]

**Supplementary Information**

**Eco-Engineered Alginate Zr/Mn Hydrogel for Ultra-Efficient Cr(VI) Removal: Insights into Mechanism and Performance**

Laila S. Alqarni1, Jari S. Algethami2, Faisal K. Algethami1, Rachid EL Kaim Billah3, Lahoucine Bahsis4*, Vaishnavi Gomase5, Eder lima6*, Ravin Jugade5*

1Department of Chemistry, College of Science, Imam Mohammad Ibn Saud Islamic University (IMSIU), Riyadh, 11623, Saudi Arabia.

2Department of Chemistry, College of Science and Arts, Najran University, P.O. Box 1988, Najran 11001, Saudi Arabia.

3Science Engineer Laboratory for Energy, ENSAJ, Chouaïb Doukkali University, El Jadida, Morocco

4 Faculté Poly-Disciplinaire, Université Cadi Ayyad, BP 4162, 46000 Safi, Morocco.

5Department of Chemistry, R.T.M. Nagpur University, Nagpur-440033, India

6Institute of Chemistry, Federal University of Rio Grande do Sul (UFRGS), Porto Alegre, RS, 91501-970, Brazil

**Equilibrium Models**

The Langmuir, Freundlich, and Liu isotherm models were applied to evaluate the adsorption equilibrium data. Equations 1, 2, and 3 represent the respective expressions for the Langmuir, Freundlich, and Liu models:

(2)

(3)

Where:

- qe​ is the amount of adsorbate adsorbed at equilibrium (mg·g⁻¹),
- Ce​ is the equilibrium concentration of the adsorbate (mg·L⁻¹),
- Qmax​ is the maximum adsorption capacity of the adsorbent (mg·g⁻¹),
- KL​ is the Langmuir equilibrium constant (L·mg⁻¹),
- KF​ is the Freundlich constant [mg·g⁻¹·(mg·L⁻¹)⁻¹⁄ⁿ_F],
- Kg​ is the Liu equilibrium constant (L·mg⁻¹),
- nF​ and nL​ are the dimensionless exponents of the Freundlich and Liu models, respectively.

**Kinetic Adsorption Models**

To better understand the adsorption behavior, four nonlinear kinetic models were applied to analyze the experimental data: the pseudo-first-order (PFO) , pseudo-second-order (PSO) , fractal-like pseudo-first-order (FL-PFO) , and fractal-like pseudo-second-order (FL-PSO) models. The corresponding mathematical expressions for each model are given by Equations **4–7:**

(4)

(5)

(6)

(7)

In these equations, t represents the contact time (min); qₜ and qₑ denote the adsorption capacities at time t and at equilibrium, respectively (mg·g⁻¹). k₁ is the pseudo-first-order rate constant (min⁻¹), while k₂ corresponds to the pseudo-second-order rate constant (g·mg⁻¹·min⁻¹). k₁.₀ and k₂.₀ are the rate constants for the fractal-like pseudo-first-order and pseudo-second-order models, respectively. The exponent n (> 0) reflects the degree of fractality, accounting for deviations from ideal kinetics due to surface heterogeneities or diffusion limitations

**Adsorption thermodynamics**

Thermodynamic studies for the adsorption of Na-ALG@ZrO2/MnO2 material were performed at temperatures ranging from 14°C to 45°C (287 to 318 K).

The Gibbs free energy change (ΔG°, kJ·mol⁻¹), enthalpy change (ΔH°, kJ·mol⁻¹), and entropy change (ΔS°, J·mol⁻¹·K⁻¹) were evaluated with the aid of Equations 8–12, respectively :

ln Ke0 (9)

(11)

(12)

Where *R* is the universal gas constant (8.314 J·K⁻¹·mol⁻¹); *T* is the absolute temperature (Kelvin);Ke0 is the thermodynamic equilibrium constant, which was calculated according to Equation 10.

Ke0 ​ is calculated by converting the values of Kg ​ (Liu equilibrium constant) or KL (Langmuir equilibrium constant), which is expressed in L·mg⁻¹ into L·mol⁻¹. Firstly, the value Kg or KLis multiplied by 1000 (mg·g⁻¹), and then multiplied by the molecular weight of the adsorbate (g·mol⁻¹), and by the standard concentration of the adsorbate (1 mol·L⁻¹), and divided by the activity coefficient of the adsorbate (dimensionless) . The solution is assumed to be sufficiently diluted to consider that the activity coefficient is unitary. Making these calculations, Ke0 becomes dimensionless .

Equation 11 was used for calculating ΔH° and ΔS°, and Equation 9 was used for calculating ΔG°.

| **Source** | | **DF** | **Adj SS** | **Adj MS** | | **F-Value** | **P-Value** |
| --- | --- | --- | --- | --- | --- | --- | --- |
| Model | | 12 | 683543 | 56962 | | 79.18 | 0.000 |
| Linear | | 5 | 153688 | 30738 | | 42.73 | 0.000 |
| pH | | 1 | 2514 | 2514 | | 3.50 | 0.065 |
| Dose (g/L) | | 1 | 888 | 888 | | 1.23 | 0.269 |
| Time (min) | | 1 | 14189 | 14189 | | 19.72 | 0.000 |
| Concentration (mg/L) | | 1 | 125072 | 125072 | | 173.86 | 0.000 |
| Temperature (K) | | 1 | 12848 | 12848 | | 17.86 | 0.000 |
| Square | | 5 | 53457 | 10691 | | 14.86 | 0.000 |
| pH*pH | | 1 | 494 | 494 | | 0.69 | 0.410 |
| Dose (g/L)*Dose (g/L) | | 1 | 1003 | 1003 | | 1.39 | 0.241 |
| Time (min)*Time (min) | | 1 | 42333 | 42333 | | 58.85 | 0.000 |
| Concentration (mg/L)*Concentration (mg/L) | | 1 | 15 | 15 | | 0.02 | 0.884 |
| Temperature (K)*Temperature (K) | | 1 | 3074 | 3074 | | 4.27 | 0.042 |
| 2-Way Interaction | | 2 | 11774 | 5887 | | 8.18 | 0.001 |
| Time (min)*Concentration (mg/L) | | 1 | 2678 | 2678 | | 3.72 | 0.057 |
| Concentration (mg/L)*Temperature (K) | | 1 | 9250 | 9250 | | 12.86 | 0.001 |
| Error | | 90 | 64743 | 719 | |  |  |
| Lack-of-Fit | | 85 | 62320 | 733 | | 1.51 | 0.346 |
| Pure Error | | 5 | 2423 | 485 | |  |  |
| Total | | 102 | 748286 |  | |  |  |
| **Model summary** | | | | | | | |
| R2 | R2adjusted | | | | R2predicted | | |
| 0.9135 | 0.9019 | | | | 0.8730 | | |

Table S1: Analysis of variance

| **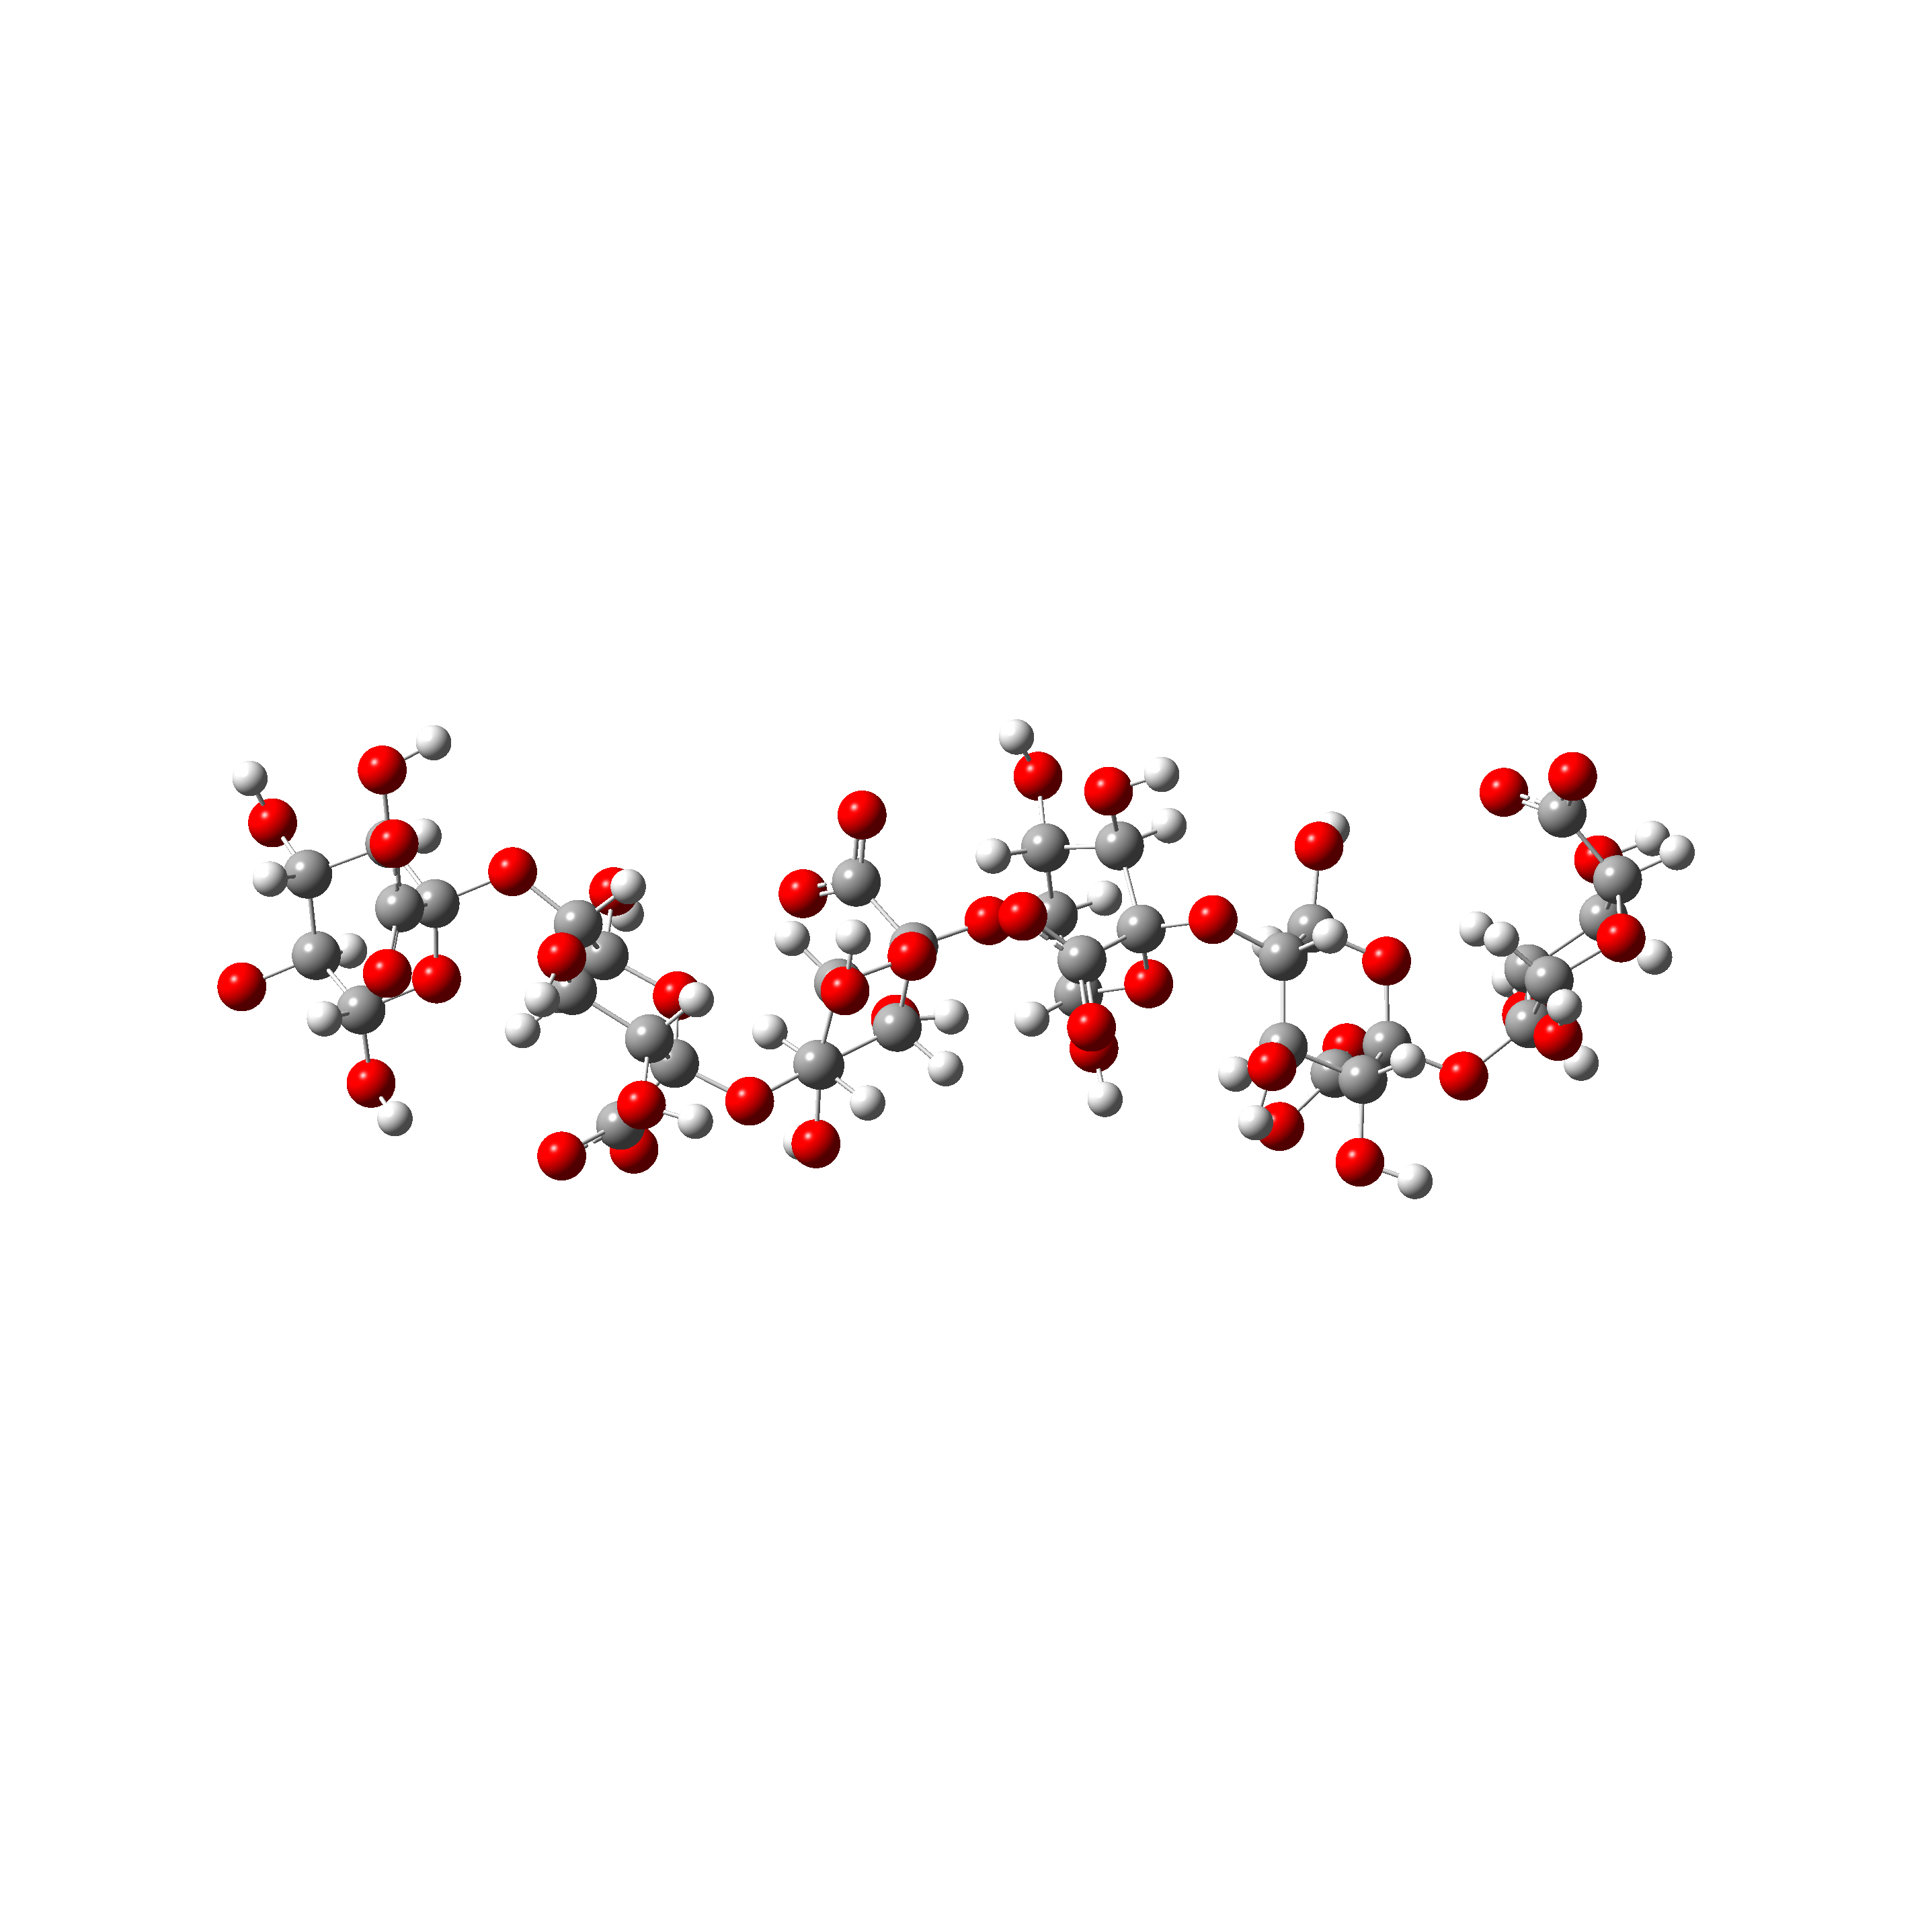** | | |
| --- | --- | --- |
| **Alginate (ALG)** | | |
| **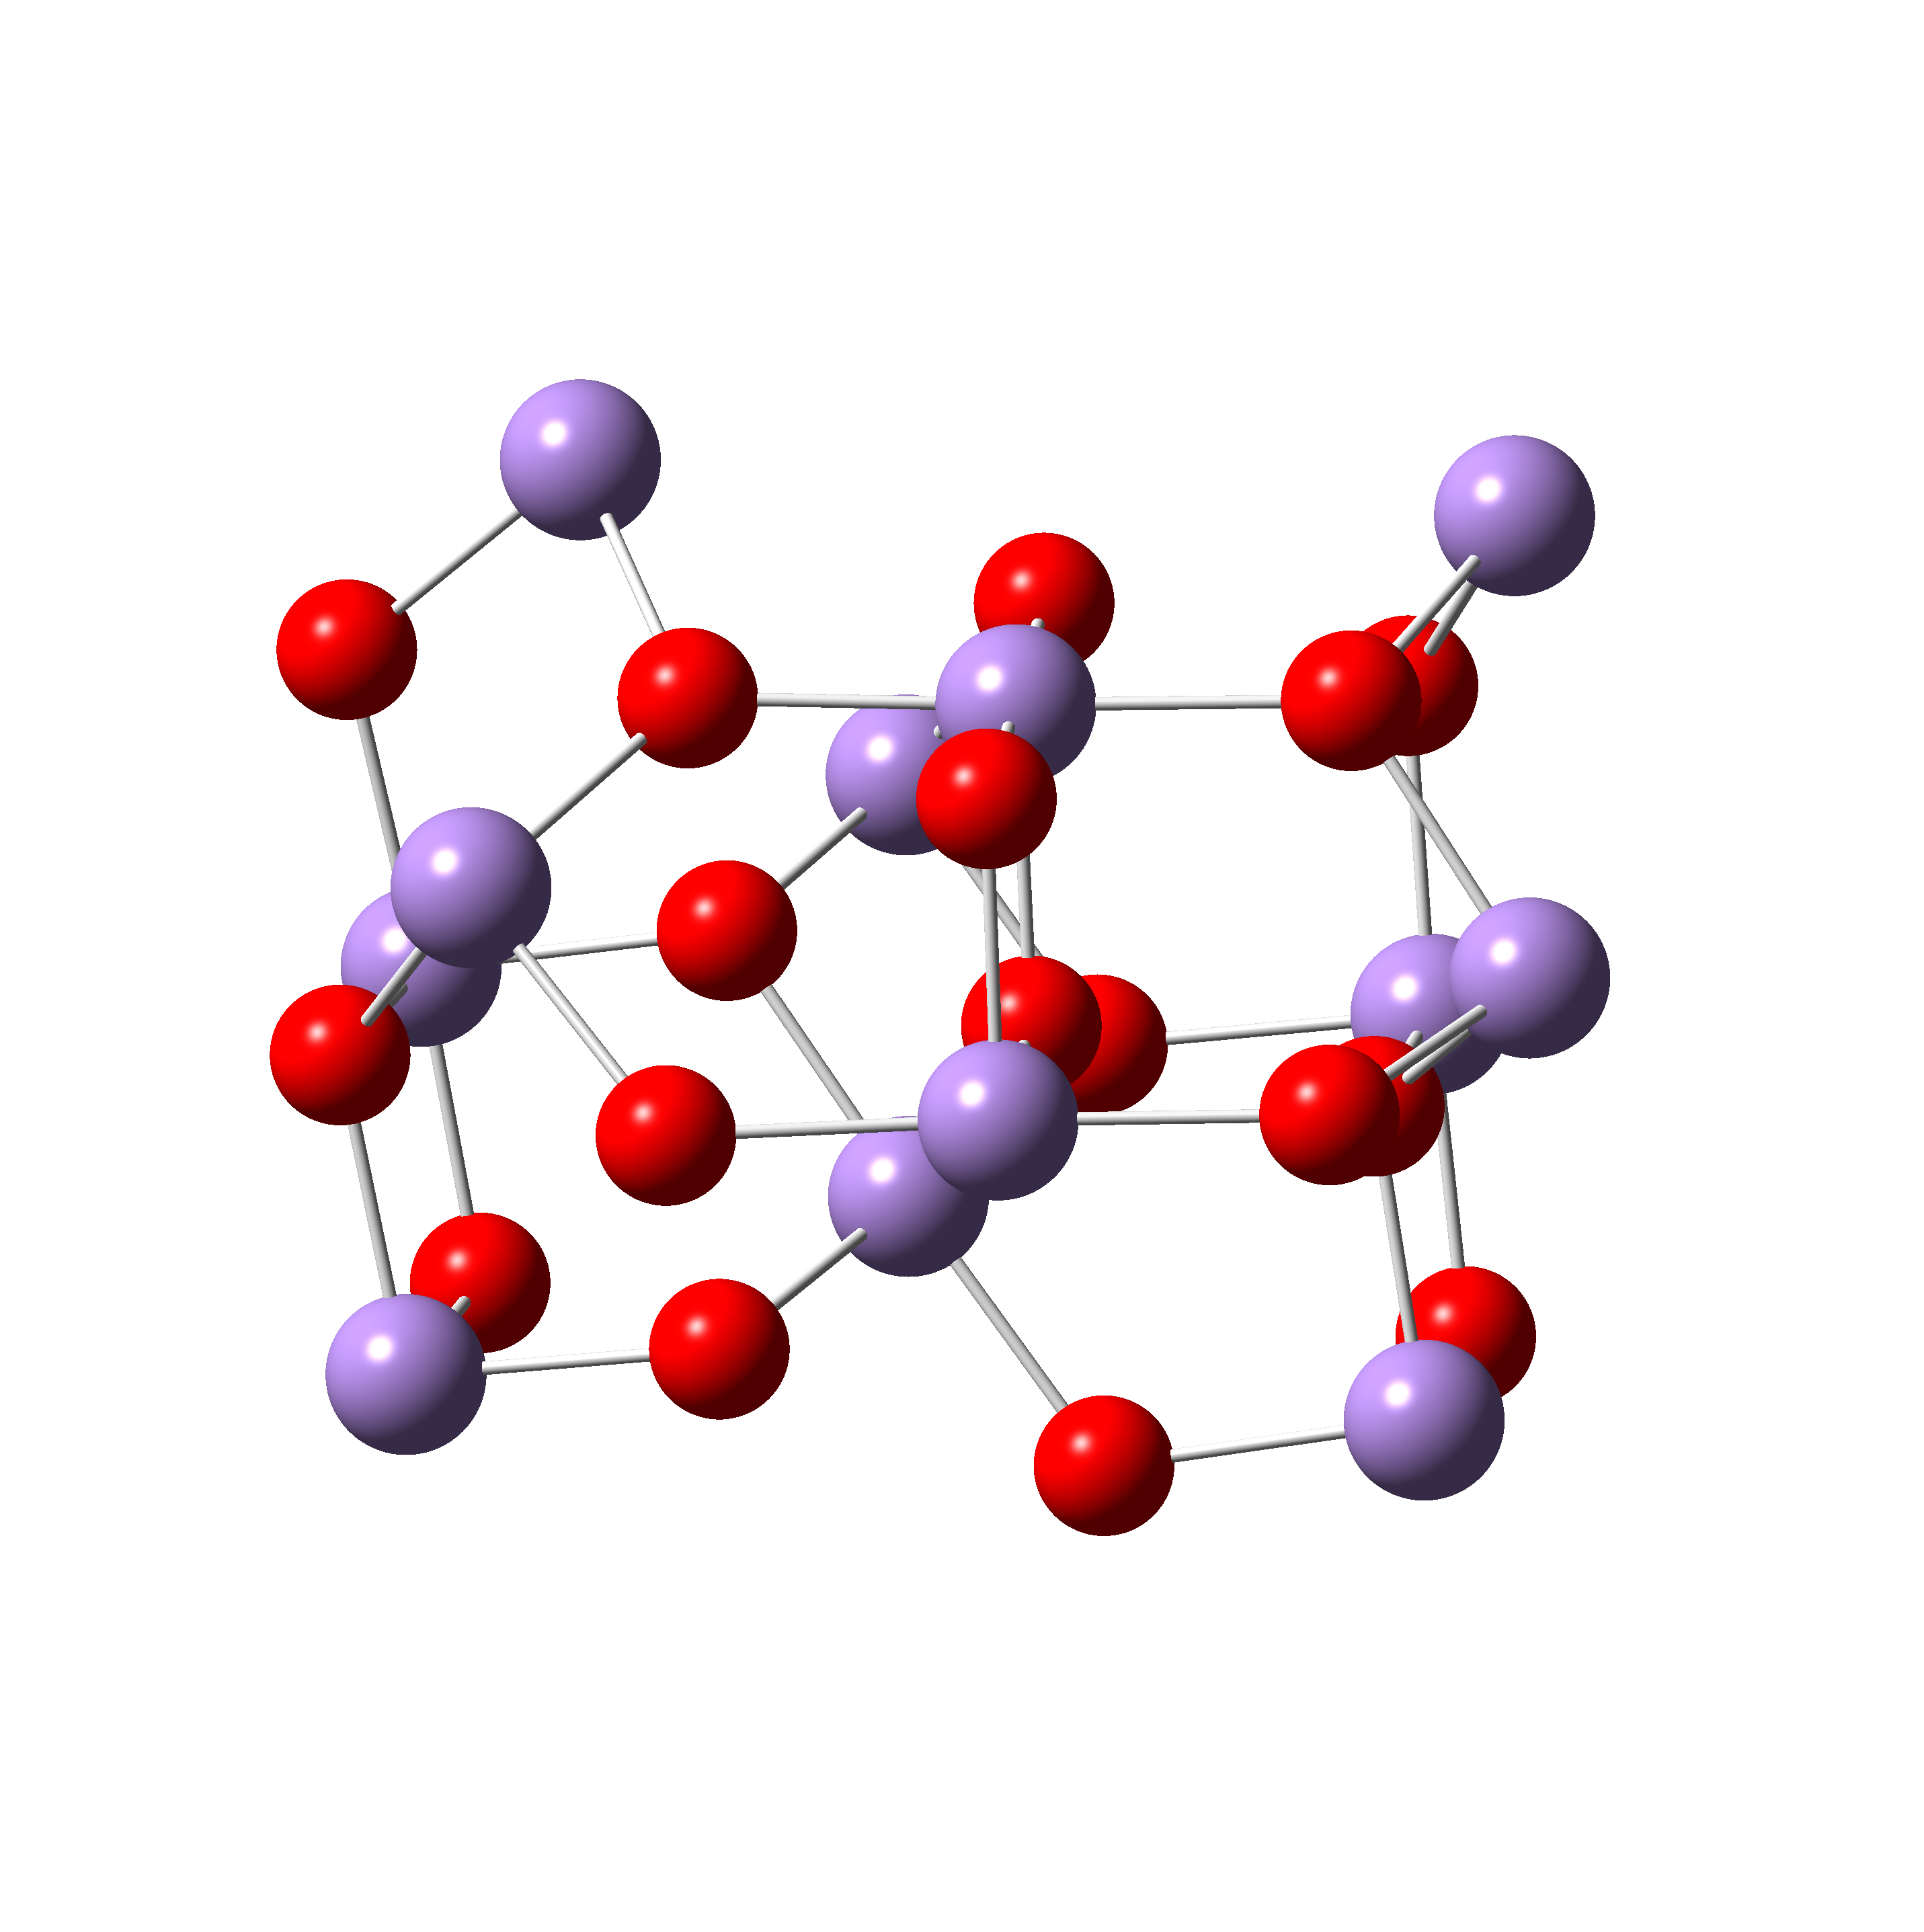** | **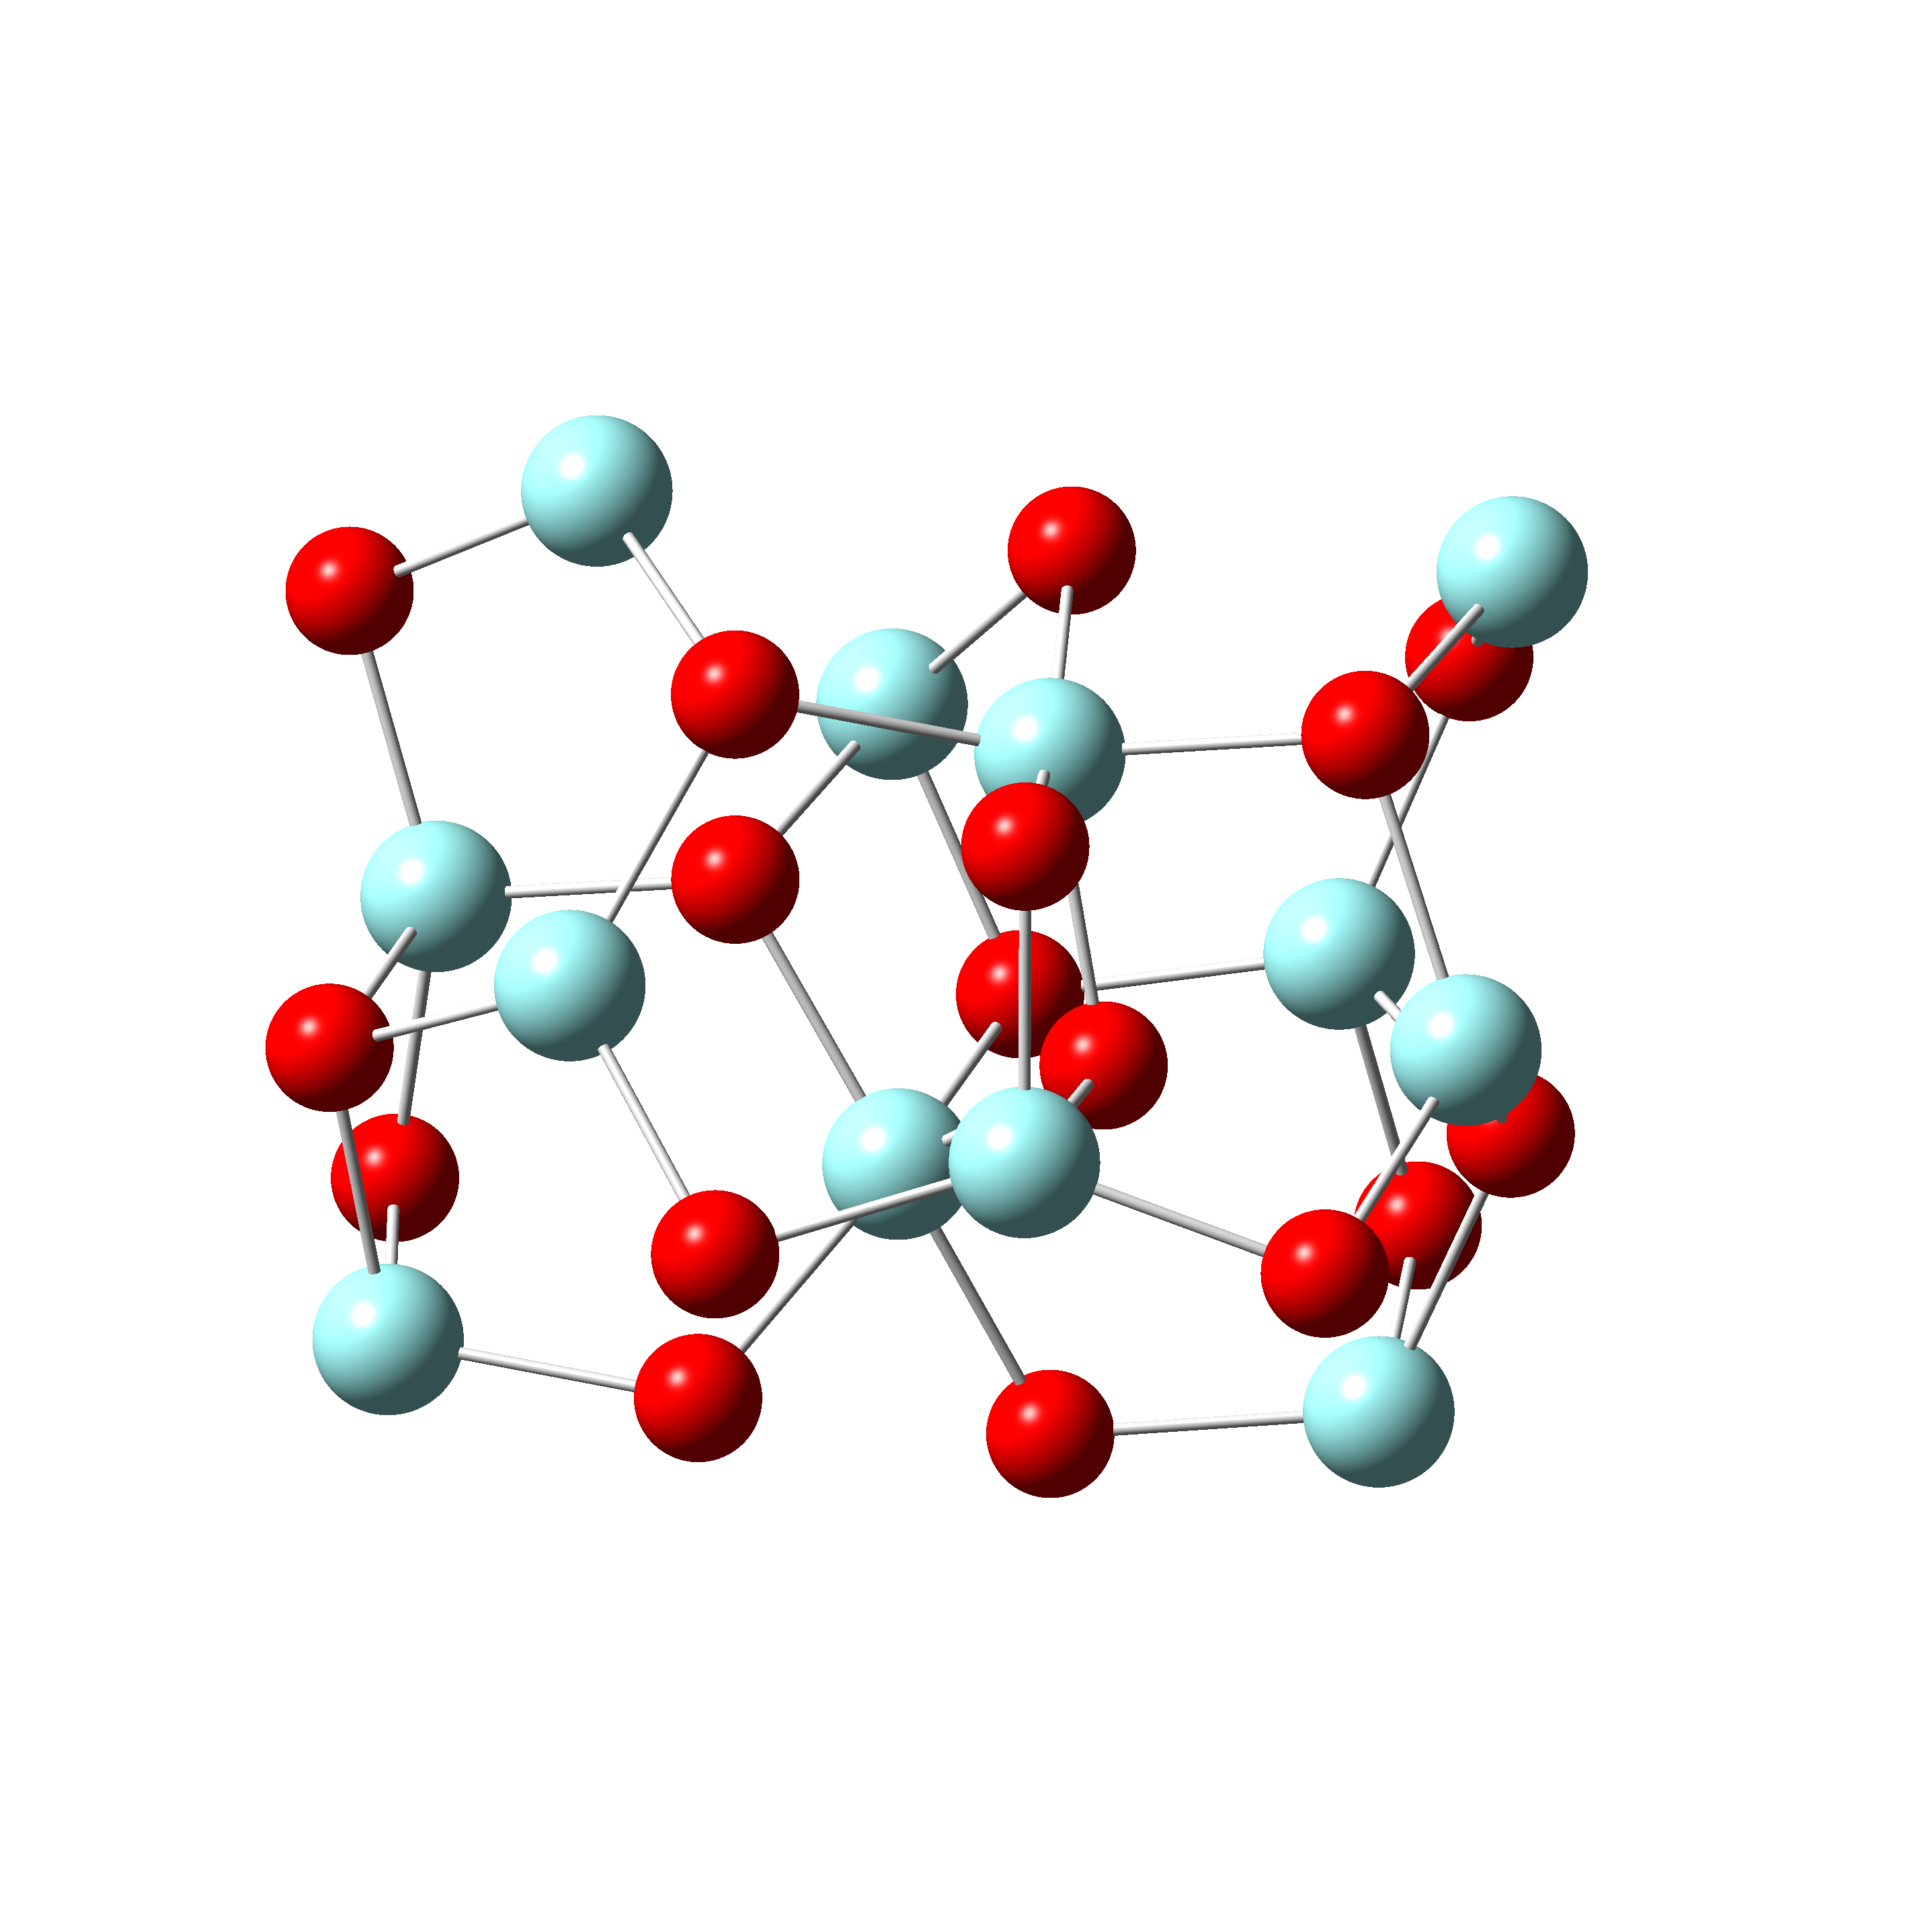** | |
| **MnO2 surface** | **ZrO2 surface** | |
| **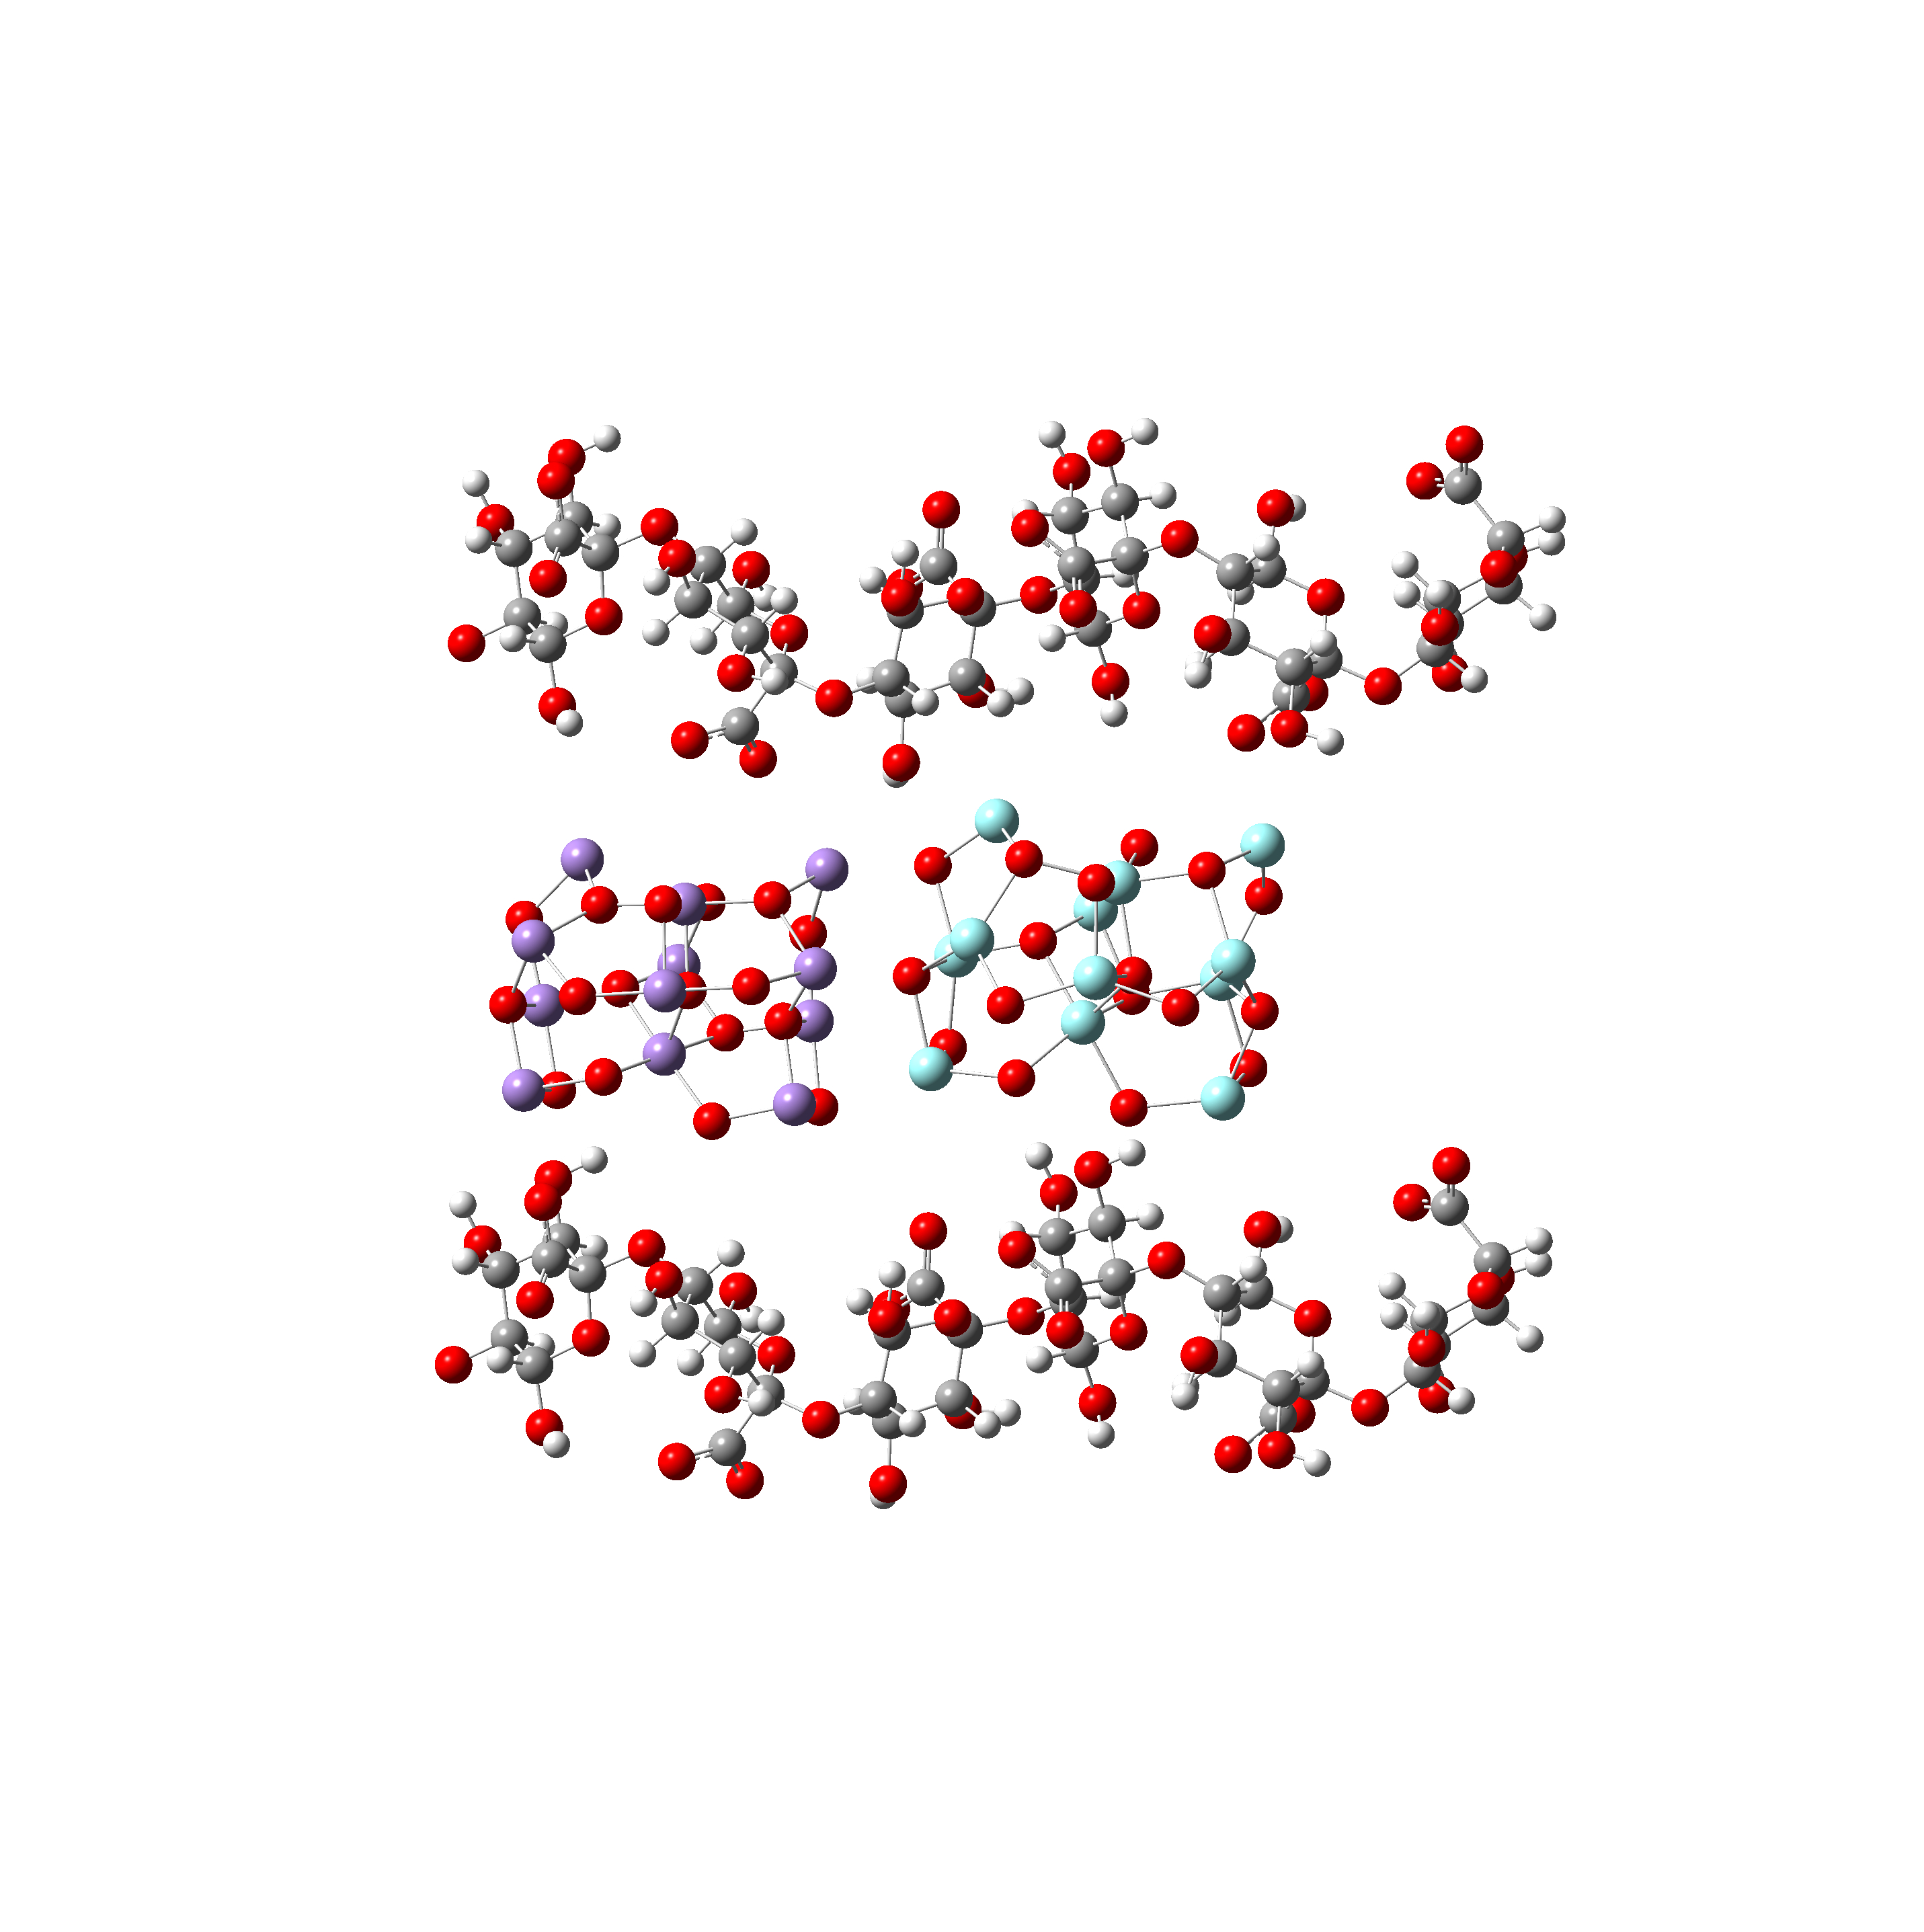** | | **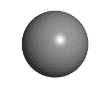** |
| **Carbon** |
| **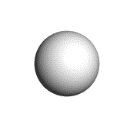** |
| **Hydrogen** |
| **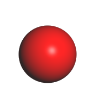** |
| **Oxygen** |
| 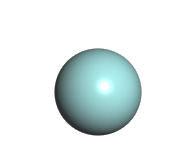 |
| **Zirconium** |
| **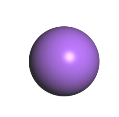** |
| **Manganese** |
|  |
|  |
| **ALG@Zr/Mn surface** | | |

**Fig. S1.** Optimized molecular structure of a) Na-ALG, b) MnO2, c) ZrO2 and d) ALG@Zr/Mn surface model at B3LYP/6-311G(d,p) level.
